# Supplementary material for: Thermodynamic Analysis of Chemical Hydrogen Storage: Energetics of Liquid Organic Hydrogen Carrier Systems Based on Methyl-Substituted Indoles
Source: MDPI journal article supplement (doi:10.3390/ma16072924), 2023-04-06
Supplement: s1 [file s1]

# Supplementary Information

**Table S1.** Provenance, purity, and methods of purification of samples used in this work.

| compound                 | CAS      | suppliers                | initial purity | final purity <sup>a</sup> |
|--------------------------|----------|--------------------------|----------------|---------------------------|
| 3-methyl-indole (cr)     | 83-34-1  | Thermo Fisher Scientific | 0.99           | 0.9998                    |
| 1,2-dimethyl-indole (cr) | 875-79-6 | Sigma-Aldrich            | 0.99           | 0.9997                    |

<sup>a</sup> Purification was performed by fractional sublimation. Mass fraction impurity determined by the gas chromatography.

**Table S2.** Reference values for  $\Delta_f H_m^0(298.15\text{ K})$  used for thermochemical calculations at  $T = 298.15\text{ K}$  ( $p^\circ = 0.1\text{ MPa}$ , in  $\text{kJ}\cdot\text{mol}^{-1}$ )

| .structure                                                                          | CAS      | compound                | Formula             | $\Delta_f H_m^0(298.15\text{ K})$ | Ref     |
|-------------------------------------------------------------------------------------|----------|-------------------------|---------------------|-----------------------------------|---------|
| <chem>CH3-CH2-CH3</chem>                                                            | 74-98-6  | propane                 | <chem>C3H8</chem>   | $-104.7 \pm 0.5\text{ (g)}$       | [1]     |
| <chem>CH3-NH-CH3</chem>                                                             | 124-40-4 | dimethylamine           | <chem>C2H7N</chem>  | $-18.6 \pm 0.8\text{ (g)}$        | [1]     |
| <chem>CH3-NH-CH2-CH3</chem>                                                         | 624-78-2 | N-methyl-ethanamine     | <chem>C3H9N</chem>  | $-46.8 \pm 2.0\text{ (g)}$        | [2]     |
| <chem>H2C=CH2</chem>                                                                | 74-85-1  | ethene                  | <chem>C2H4</chem>   | $52.5 \pm 0.4\text{ (g)}$         | [1]     |
|    | 109-97-7 | 1-H-pyrole              | <chem>C4H5N</chem>  | $108.3 \pm 0.4\text{ (g)}$        | [1]     |
|   | 108-88-3 | toluene                 | <chem>C7H8</chem>   | $50.4 \pm 0.6\text{ (g)}$         | [1]     |
|  | 612-17-9 | 1,4-dihydro-naphtalene  | <chem>C10H10</chem> | $138.4 \pm 1.6\text{ (g)}$        | [3]     |
|  | 638-31-3 | 2-pyrroline             | <chem>C4H7</chem>   | $53.4 \pm 3.5\text{ (liq)}$       | Fig. S1 |
|  | 496-11-7 | indane                  | <chem>C9H10</chem>  | $11.5 \pm 1.6\text{ (liq)}$       | [1]     |
|  | 95-13-6  | indene                  | <chem>C9H8</chem>   | $110.6 \pm 1.6\text{ (liq)}$      | [1]     |
|  | 496-10-6 | trans-hexa-hydro-indane | <chem>C9H16</chem>  | $-176.2 \pm 1.8\text{ (liq)}$     | [1]     |
|  | 142-29-0 | cyclopentene            | <chem>C5H8</chem>   | $4.4 \pm 0.8\text{ (liq)}$        | [1]     |
|  | 287-92-3 | cyclopentane            | <chem>C5H10</chem>  | $-105.1 \pm 0.8\text{ (liq)}$     | [1]     |
|  | 71-43-2  | benzene                 | <chem>C6H6</chem>   | $49.0 \pm 0.6\text{ (liq)}$       | [1]     |

|                                                                                   |          |             |                                 |                  |     |
|-----------------------------------------------------------------------------------|----------|-------------|---------------------------------|------------------|-----|
|  | 110-82-7 | cyclohexane | C <sub>6</sub> H <sub>12</sub>  | -156.4±0.8 (liq) | [1] |
|  | 123-75-1 | pyrrolidine | C <sub>4</sub> H <sub>9</sub> N | -41.0±0.8 (liq)  | [1] |

**Table S3.** The enthalpies of homodesmotic reactions (see Fig. 5) involving 3-methyl-indole  $\Delta_r H_m^0(g)$  at  $T = 298.15$  K ( $p^0 = 0.1$  MPa, in kJ·mol<sup>-1</sup>)

| $\Delta_r H_m^0(g, 298.15 \text{ K})$ | R-A  | R-B   | R-C  |
|---------------------------------------|------|-------|------|
| G4                                    | 92.0 | -19.4 | 97.9 |
| G3MP2                                 | 89.5 | -21.0 | 95.2 |
| CBS-APNO                              | 90.8 | -19.2 | 97.0 |

**Table S4.** Thermodynamics of phase transitions of indole derivatives (in kJ·mol<sup>-1</sup>)<sup>a</sup>.

| Compounds                 | $\Delta_{\text{crII}}^{\text{crI}} H_m^0$ at $T_{\text{tr}}$ | $T_{\text{fus}}/K$ | $\Delta_{\text{cr}}^{\text{I}} H_m^0$ at $T_{\text{fus}}$ | $\Delta_{\text{cr}}^{\text{I}} H_m^0$ <sup>b</sup> | $\Delta_{\text{cr}}^{\text{g}} H_m^0$ <sup>c</sup> | $\Delta_{\text{I}}^{\text{g}} H_m^0$ <sup>d</sup> |
|---------------------------|--------------------------------------------------------------|--------------------|-----------------------------------------------------------|----------------------------------------------------|----------------------------------------------------|---------------------------------------------------|
| 1                         | 2                                                            | 3                  | 4                                                         | 5                                                  | 6                                                  | 7                                                 |
| 3-methylindole (phase II) | 2.7±0.4 (316.8 K) [4]                                        | 368.0 [4]          | 11.6±0.5                                                  | 11.4±1.2 <sup>e</sup>                              | 81.4±0.6                                           | 70.0±1.3                                          |
| 3-methylindole (phase I)  | 2.7±0.4 (316.8 K)                                            |                    |                                                           | 1.9±0.4 <sup>f</sup>                               | 81.2±0.7 <sup>g</sup>                              | 69.8±0.6                                          |
| 2-methylindole            | -                                                            | 332.0 [S4]         | 14.8±0.1 <sup>i</sup> [S4]                                |                                                    |                                                    |                                                   |
| 1,2-dimethylindole        |                                                              | 330.7 [5]          | 14.9±1.0 <sup>j</sup>                                     | 13.3±1.1                                           | 83.2±0.7                                           | 69.9±1.3                                          |
| 2,3-dimethylindole        |                                                              | 380.2 [6]          | 17.1±1.0 <sup>j</sup>                                     | 12.9±1.6                                           | 86.0±0.6                                           | 73.1±1.7 <sup>k</sup>                             |

<sup>a</sup> Uncertainties in this table are expressed as expanded uncertainties at a level of confidence of 0.95,  $k=2$ ).

<sup>b</sup> The experimental enthalpies of fusion  $\Delta_{\text{cr}}^{\text{I}} H_m^0$  measured at  $T_{\text{fus}}$  were adjusted to 298.15 K with help of equation:

$\Delta_{\text{cr}}^{\text{I}} H_m^0(298.15 \text{ K})/(\text{J} \cdot \text{mol}^{-1}) = \Delta_{\text{cr}}^{\text{I}} H_m^0(T_{\text{fus}}/K) - (\Delta_{\text{cr}}^{\text{g}} C_{p,m}^0 - \Delta_{\text{I}}^{\text{g}} C_{p,m}^0) \times [(T_{\text{fus}}/K) - 298.15 \text{ K}]$  and heat capacity differences given in Table S3.

<sup>c</sup> From Table 4.

<sup>d</sup> Calculated as the difference of column 6 and 5 in this table.

<sup>e</sup> Sum of  $\Delta_{\text{crII}}^{\text{crI}} H_m^0$  and  $\Delta_{\text{cr}}^{\text{I}} H_m^0$  was adjusted from  $T_{\text{fus}}$  to  $T = 298.15$  K using equation in footnote b.

<sup>f</sup> The phase transition enthalpy  $\Delta_{\text{crII}}^{\text{crI}} H_m^0$  was adjusted from  $T_{\text{tr}}$  to  $T = 298.15$  K using equation in footnote b.

<sup>g</sup> Calculated as follows:  $\Delta_{\text{cr}}^{\text{g}} H_m^0(\text{crII}) = (79.3 \pm 0.5) + (1.9 \pm 0.4) = (81.2 \pm 0.7) \text{ kJ} \cdot \text{mol}^{-1}$  with  $\Delta_{\text{cr}}^{\text{g}} H_m^0(\text{crI})$  from Table 4.

<sup>i</sup> The Walden Constant [7] calculated for 2-methyl-indole according to equation:  $WC = \Delta_{\text{cr}}^{\text{I}} H_m^0 / T_{\text{fus}} = 14.8/332.0 = 0.045 \text{ J} \cdot \text{mol}^{-1} \cdot \text{K}^{-1}$ .

<sup>j</sup> Calculate using the Walden Constant [7] calculated for 2-methyl-indole according to equation:  $\Delta_{\text{cr}}^{\text{I}} H_m^0 = WC \times T_{\text{fus}} = 0.045 \times 330.7 = 14.9 \pm 1.0 \text{ kJ} \cdot \text{mol}^{-1}$  for 1,2-dimethyl-indole and  $\Delta_{\text{cr}}^{\text{I}} H_m^0 = WC \times T_{\text{fus}} = 0.045 \times 380.2 = 17.1 \pm 1.0 \text{ kJ} \cdot \text{mol}^{-1}$  for 2,3-dimethyl-indole.

<sup>k</sup> For comparison  $\Delta_{\text{I}}^{\text{g}} H_m^0 = (75.2 \pm 1.0)$  from Table 2.

In 1908 Paul Walden found that the ratio according to Eq. 8 can be considered as a constant (Walden's Constant) [8]:

$$WC = \frac{\Delta_{cr,l}^l H_m^o}{T_{fus}} = \Delta_{cr,l}^l S_m^o = 56.5 \text{ J}\cdot\text{K}^{-1}\cdot\text{mol}^{-1} \text{ (S1)}$$

From a practical point of view and based on our experience, Eq. S1 can be easily adapted for calculations within a range of similarly shaped molecules. We have already observed similarity of *Walden's Constants* for R-acetanilides with R = alkyl, F, Cl, Br, NO<sub>2</sub>, NH<sub>2</sub>, OH, OCH<sub>3</sub> [9] and for the for R-substituted benzamides [10]. We have found that for these series the WC for each series deviates from the "classic" value 56.5 J·K<sup>−1</sup>·mol<sup>−1</sup> by about ± 10 J·K<sup>−1</sup>·mol<sup>−1</sup>. Such a "modified" *Walden's Constant* helps not only in evaluating the consistency of the experimental fusion data within a set of similarly structured compounds (see Table 12), but also the *Walden's rule* serves as a valuable tool for estimating missing fusion enthalpies of interesting organic compounds, provided that their fusion temperatures are available.

**Table S5.** Compilation of data on molar heat capacities  $C_{p,m}^o$ (cr or liq) and heat capacity differences  $\Delta_{cr,l}^g C_{p,m}^o$  (in J·K<sup>−1</sup>·mol<sup>−1</sup>) at  $T = 298.15 \text{ K}$

| Compounds             | $C_{p,m}^o$ (cr) <sup>a</sup> | $-\Delta_{cr,l}^g C_{p,m}^o$ <sup>b</sup> | $C_{p,m}^o$ (liq) <sup>a</sup> | $-\Delta_{cr,l}^g C_{p,m}^o$ <sup>b</sup> |
|-----------------------|-------------------------------|-------------------------------------------|--------------------------------|-------------------------------------------|
| 3-methyl-indole       | 175.5                         | 27.1                                      | 224.6                          | 69.1                                      |
| 1,2-dimethyl-indole   | 202.2                         | 31.1                                      | 231.6                          | 70.8                                      |
| 1,3-dimethyl-indole   | 202.2                         | 31.1                                      | 231.6                          | 70.8                                      |
| 2,3-dimethyl-indole   | 160.2                         | 24.8                                      | 282.7                          | 84.1                                      |
| 3-methyl-indoline     |                               |                                           | 247.4                          | 74.8                                      |
| 1,2-dimethyl-indoline |                               |                                           | 258.5                          | 77.8                                      |
| 1,3-dimethyl-indoline |                               |                                           | 258.5                          | 77.8                                      |
| 2,3-dimethyl-indoline |                               |                                           | 281.9                          | 83.9                                      |

<sup>a</sup> Calculated according to the procedure developed by Chickos et al. [11].

<sup>b</sup> Calculated according to the procedure developed by Acree and Chickos [12] by using experimental heat capacities  $C_{p,m}^o$ (cr or liq) from this table.

### Transpiration method

Absolute vapour pressures were measured using the transpiration method [13,14]. The main idea of this method is to saturate the gas stream flowing over the sample and to determine the amount of compound transferred by the gas within a given time. Approximately 0.5 to 0.8 g of the sample is mixed with glass beads (diameter 1 mm) and placed in the thermostatted U-shaped saturator. The glass beads are needed to enlarge the contact area between gas and sample. A stream of nitrogen at a well-defined flow rate was passed through the saturator at constant temperature (± 0.1 K), and the transported material was collected in a cold trap. The amount of the condensed substance was determined by GC. The saturation vapour pressure  $p_i$  at each temperature  $T_i$  was calculated from the amount of condensate collected within a definite period of time:

$$p_i = m_i \cdot R \cdot T_a / V \cdot M_i ; \quad V = (n_{N_2} + n_i) \cdot R \cdot T_a / P_a \text{ (S2)}$$

where  $V$  is the volume of the gas phase consisting of the  $n_{N_2}$  moles of the carrier gas and  $n_i$  mole of gaseous compound under study (with the molar mass  $M_i$ ) at the atmospheric pressure  $P_a$  and the ambient temperature  $T_a$ . The volume of the carrier gas  $V_{N_2}$  was determined by the digital flow rate sensor from integration with a microcontroller. We used the Honeywell S&C - HAFBLF0200C2AX5 digital flow rate sensor with uncertainty at the level of 2.5 %. The flow rate of the nitrogen stream was also controlled by using a soap bubble flow meter (HP soap film flowmeter (model 0101-0113)) and optimized in order to reach the saturation equilibrium of the transporting gas at each temperature under study. The volume of the carrier gas  $V_{N_2}$  was read from the digital flow sensor. The amount of the compound under investigation  $n_i$  in the carrier gas was estimated at each temperature using the ideal gas law.

Before starting the vapour pressure measurements, the sample was first pre-conditioned at 310–320 K (within about one hour) in order to remove possible traces of water. The saturator was then kept at 310–315 K (to remove possible traces of volatile compounds). To ensure that preconditioning was completed at the selected temperature, three samples were taken sequentially during sample rinsing and analyzed by GC. A constant vapour pressure at this temperature indicated that the transpiration experiments could begin. GC analysis of the transported material did not reveal any additional contamination. The absence of impurities and decomposition products was re-checked by GC analysis of the saturator content at the end of the entire series of experiments.

#### *Thermodynamics of vaporisation/sublimation*

Experimental vapour pressures measured in this work (as well as those from the literature) have been used to obtain the enthalpies of vaporisation using the following equation:

$$\Delta_1^g H_m^o(T) = -b + \Delta_1^g C_{p,m}^o \times T \quad (S3)$$

Experimental vapour pressures temperature dependences were also used to derive the vaporisation entropies at temperatures  $T$  by using the following equation:

$$\Delta_1^g S_m^o(T) = \Delta_1^g H_m^o/T + R \times \ln(p_i/p^o) \quad (S4)$$

with  $p^o = 0.1$  MPa. Coefficients  $a$  and  $b$  of Eq. (1),  $\Delta_1^g H_m^o(T)$  and  $\Delta_1^g S_m^o(T)$  values are collected in Table 1. The Eqs. S3–S4 are also valid for the treatment of vapour pressures measured over the solid sample, giving the standard molar enthalpy of sublimation  $\Delta_{cr}^g H_m^o(T)$  and the standard molar sublimation entropy  $\Delta_{cr}^g S_m^o(T)$ . In this case in Eqs. S3–S4 we used the value  $\Delta_{cr}^g C_{p,m}^o$  instead of the  $\Delta_1^g C_{p,m}^o$ -values (see Table S2). The combined uncertainties of the vaporisation enthalpies include uncertainties from the experimental conditions of transpiration. The uncertainties in vapour pressure and uncertainties due to the temperature adjustment to  $T = 298.15$  K as described elsewhere [15,16]. The compilation of the standard molar enthalpies of vaporisation at the reference temperature  $T = 298.15$  K, calculated according to Eq. (S3) is given in Table 1.

#### *Temperature adjustments of sublimation/vaporisation enthalpies.*

According to general practice, all thermochemical quantities must be represented at the reference temperature  $T = 298.15$  K. Sublimation/vaporisation enthalpy derived from vapour pressure measurements are usually referenced to the average temperature,  $T_{av}$ , of the experimental range. In any case, they need to be adjusted to  $T = 298.15$  K using a Kirchhoff's Law. The isobaric heat capacity differences  $\Delta_{cr,l}^g C_{p,m}^o$  are required for temperature adjustment of vaporisation/sublimation enthalpies according to Kirchhoff's rule. The simple and straightforward method was developed by Chickos and Acree [17]. They suggested an empirical way to assess  $\Delta_1^g C_{p,m}^o$ -values by equation:

$$\Delta_1^g C_{p,m}^o(298.15 \text{ K}) = 0.26 \times C_{p,m}^o(\text{liq}, 298.15) + 10.58 \quad (S4)$$

where  $C_{p,m}^o(\text{liq}, 298.15 \text{ K})$ -data are of experimental origin or they can be also estimated according to the group-additivity procedure [11].

$$\Delta_{cr}^g C_{p,m}^o(298.15 \text{ K}) = 0.15 \times C_{p,m}^o(\text{cr}, 298.15) + 0.72 \quad (S5)$$

where  $C_{p,m}^o(\text{cr}, 298.15 \text{ K})$ -data are of experimental origin or they can be also estimated according to the group-additivity procedure [11].

**Table S6.** Vapor pressures,  $p_i$ , at different temperatures compiled from the literature [18], standard molar vaporisation enthalpies,  $\Delta_1^g H_m^0$ , and standard molar vaporisation entropies,  $\Delta_1^g S_m^0$

| $T/$<br>K <sup>a</sup>                                                                                                                                                                                                                   | $p_i/$<br>Pa <sup>e</sup> | $\Delta_1^g H_m^0(T)/^a$<br>kJ·mol <sup>-1</sup> | $\Delta_1^g S_m^0(T)/$<br>J·K <sup>-1</sup> ·mol <sup>-1</sup> |
|------------------------------------------------------------------------------------------------------------------------------------------------------------------------------------------------------------------------------------------|---------------------------|--------------------------------------------------|----------------------------------------------------------------|
| 3-methylindoline. $\Delta_1^g H_m^0(298.15 \text{ K}) = (65.1 \pm 1.9) \text{ kJ} \cdot \text{mol}^{-1}$<br>$\ln(p/p_{ref}) = \frac{304.6}{R} - \frac{87406.2}{RT} - \frac{74.8}{R} \ln \frac{T}{298.15}$ ; $p_{ref} = 1 \text{ Pa}$     |                           |                                                  |                                                                |
| 525                                                                                                                                                                                                                                      | 101325                    | 48.1                                             | 91.7                                                           |
| 329                                                                                                                                                                                                                                      | 47                        | 62.8                                             | 127.0                                                          |
| 330                                                                                                                                                                                                                                      | 47                        | 62.7                                             | 126.2                                                          |
| 2,3-dimethylindoline: $\Delta_1^g H_m^0(298.15 \text{ K}) = (67.1 \pm 3.9) \text{ kJ} \cdot \text{mol}^{-1}$<br>$\ln(p/p_{ref}) = \frac{313.3}{R} - \frac{90269.8}{RT} - \frac{77.8}{R} \ln \frac{T}{298.15}$ ; $p_{ref} = 1 \text{ Pa}$ |                           |                                                  |                                                                |
| 523                                                                                                                                                                                                                                      | 101325                    | 49.6                                             | 94.9                                                           |
| 517                                                                                                                                                                                                                                      | 101325                    | 50.0                                             | 96.9                                                           |
| 508                                                                                                                                                                                                                                      | 101325                    | 50.7                                             | 100.0                                                          |
| 407                                                                                                                                                                                                                                      | 2666                      | 58.6                                             | 113.8                                                          |
| 398                                                                                                                                                                                                                                      | 2666                      | 59.3                                             | 118.8                                                          |
| 1,2-dimethyl-indoline $\Delta_1^g H_m^0(298.15 \text{ K}) = (60.8 \pm 2.3) \text{ kJ} \cdot \text{mol}^{-1}$<br>$\ln(p/p_{ref}) = \frac{306.0}{R} - \frac{84019.0}{RT} - \frac{77.8}{R} \ln \frac{T}{298.15}$ ; $p_{ref} = 1 \text{ Pa}$ |                           |                                                  |                                                                |
| 501                                                                                                                                                                                                                                      | 101325                    | 45.0                                             | 90.0                                                           |
| 500                                                                                                                                                                                                                                      | 101325                    | 45.1                                             | 90.3                                                           |
| 378                                                                                                                                                                                                                                      | 3333                      | 54.6                                             | 116.1                                                          |
| 377                                                                                                                                                                                                                                      | 2400                      | 54.7                                             | 114.0                                                          |
| 376                                                                                                                                                                                                                                      | 2400                      | 54.8                                             | 114.6                                                          |
| 373                                                                                                                                                                                                                                      | 3333                      | 55.0                                             | 119.1                                                          |
| 368                                                                                                                                                                                                                                      | 1733                      | 55.4                                             | 116.7                                                          |
| 368                                                                                                                                                                                                                                      | 1733                      | 55.4                                             | 116.7                                                          |
| 367                                                                                                                                                                                                                                      | 1733                      | 55.5                                             | 117.3                                                          |
| 367                                                                                                                                                                                                                                      | 1733                      | 55.5                                             | 117.3                                                          |
| 315                                                                                                                                                                                                                                      | 47                        | 59.5                                             | 125.0                                                          |
| 314                                                                                                                                                                                                                                      | 47                        | 59.6                                             | 125.9                                                          |
| 1,3-dimethyl-indole, $\Delta_1^g H_m^0(298.15 \text{ K}) = (67.9 \pm 1.2) \text{ kJ} \cdot \text{mol}^{-1}$<br>$\ln(p/p_{ref}) = \frac{304.0}{R} - \frac{89039.1}{RT} - \frac{70.8}{R} \ln \frac{T}{298.15}$ ; $p_{ref} = 1 \text{ Pa}$  |                           |                                                  |                                                                |
| 533                                                                                                                                                                                                                                      | 101325                    | 51.3                                             | 96.3                                                           |
| 533                                                                                                                                                                                                                                      | 101325                    | 51.3                                             | 96.3                                                           |
| 532                                                                                                                                                                                                                                      | 101325                    | 51.4                                             | 96.8                                                           |
| 530                                                                                                                                                                                                                                      | 101325                    | 51.5                                             | 97.3                                                           |
| 529                                                                                                                                                                                                                                      | 101325                    | 51.6                                             | 97.6                                                           |
| 418                                                                                                                                                                                                                                      | 2400                      | 59.4                                             | 111.1                                                          |
| 413                                                                                                                                                                                                                                      | 2400                      | 59.8                                             | 113.7                                                          |
| 393                                                                                                                                                                                                                                      | 933                       | 61.2                                             | 116.8                                                          |
| 392                                                                                                                                                                                                                                      | 933                       | 61.3                                             | 117.4                                                          |
| 385                                                                                                                                                                                                                                      | 1067                      | 61.8                                             | 122.6                                                          |
| 353                                                                                                                                                                                                                                      | 80                        | 64.0                                             | 122.0                                                          |
| 336                                                                                                                                                                                                                                      | 47                        | 65.2                                             | 130.3                                                          |

| 335                                                                                                                      | 47     | 65.3 | 131.1 |
|--------------------------------------------------------------------------------------------------------------------------|--------|------|-------|
| 1,3-dimethylindoline: $\Delta_f^g H_m^o(298.15 \text{ K}) = (60.0 \pm 2.3) \text{ kJ} \cdot \text{mol}^{-1}$             |        |      |       |
| $\ln(p/p_{ref}) = \frac{298.5}{R} - \frac{83158.9}{RT} - \frac{77.8}{R} \ln \frac{T}{298.15}$ ; $p_{ref} = 1 \text{ Pa}$ |        |      |       |
| 523                                                                                                                      | 101325 | 42.5 | 81.3  |
| 324                                                                                                                      | 67     | 57.9 | 117.9 |
| 322                                                                                                                      | 67     | 58.1 | 119.5 |

<sup>a</sup> Uncertainties of the vaporisation enthalpies are expressed as the expanded uncertainty (0.95 level of confidence,  $k = 2$ ). They include uncertainties from the fitting equation, and uncertainties from temperature adjustment to  $T = 298.15 \text{ K}$ . Uncertainties in the temperature adjustment of vaporisation enthalpies to the reference temperature  $T = 298.15 \text{ K}$  are estimated to account with 20 % to the total adjustment.

**Table S7.** Correlation of vaporization enthalpies,  $\Delta_f^g H_m^o(298.15 \text{ K})$ , of aromatic hydrocarbons with their Lee's indices ( $J_{Lee}$ )

| .Compound            | $J_{Lee}^a$ | $\Delta_f^g H_m^o(298 \text{ K})_{exp}$<br>kJ·mol <sup>-1</sup> | $\Delta_f^g H_m^o(298 \text{ K})_{calc}^b$<br>kJ·mol <sup>-1</sup> | $\Delta^c$<br>kJ·mol <sup>-1</sup> |
|----------------------|-------------|-----------------------------------------------------------------|--------------------------------------------------------------------|------------------------------------|
| tetraline            | 197.0       | 55.2                                                            | 54.7                                                               | 0.5                                |
| quinoline            | 210.3       | 59.3                                                            | 58.3                                                               | 1.0                                |
| iso-quinoline        | 214.1       | 59.5                                                            | 59.4                                                               | 0.1                                |
| 2-methyl-quinoline   | 224.1       | 61.8                                                            | 62.1                                                               | -0.3                               |
| 3-methyl-quinoline   | 232.5       | 63.8                                                            | 64.4                                                               | -0.6                               |
| 4-methyl-quinoline   | 235.8       | 64.3                                                            | 65.2                                                               | -0.9                               |
| 6-methylquinoline    | 229.8       | 64.0                                                            | 63.6                                                               | 0.4                                |
| 7-methylquinoline    | 231.4       | 63.7                                                            | 64.1                                                               | -0.4                               |
| 8-methyl-quinoline   | 225.2       | 62.0                                                            | 62.4                                                               | -0.4                               |
| 2-phenyl-quinoline   | 339.2       | 92.7                                                            | 93.3                                                               | -0.6                               |
| 2-phenyl-N-Me-indole | 340.4       | 94.0                                                            | 93.6                                                               | 0.4                                |
| 2-phenyl-N-Et-indole | 356.0       | 98.3                                                            | 97.8                                                               | 0.5                                |
| 1,2-dimethyl-indole  | 244.4       |                                                                 | <b>67.6±1.0</b>                                                    |                                    |

<sup>a</sup> Kovats's indices at 323 K,  $J_{Lee}$ , on the standard non-polar column SE-52 [19].

<sup>b</sup> Calculated using Eq. :

$$\Delta_f^g H_m^o(298.15 \text{ K}) / (\text{kJ} \cdot \text{mol}^{-1}) = 1.3 + 0.2712 \times J_{Lee} \quad \text{with } (R^2 = 0.999)$$

with the assessed expanded uncertainty of  $\pm 1.0 \text{ kJ} \cdot \text{mol}^{-1}$  (0.95 level of confidence,  $k = 2$ )

<sup>c</sup> Difference between column 4 and 5 in this table.

**Table S8.** Difference in energetics between the *liquid-phase* reaction enthalpies,  $\Delta_r H_m^o(\text{liq})$ , and the *gas-phase* reaction enthalpies,  $\Delta_r H_m^o(\text{g})$ , of the hydrogenation of indole derivatives, at  $T = 298.15 \text{ K}$  ( $p^\circ = 0.1 \text{ MPa}$ , in  $\text{kJ} \cdot \text{mol}^{-1}$ )

| Substituents                                            | Reaction R-I<br>$\Delta(\Delta_r H_m^o)$ | Reaction R-II<br>$\Delta(\Delta_r H_m^o)$ | Reaction R-III<br>$\Delta(\Delta_r H_m^o)$ | $\Delta(\Delta_r H_m^o)/H_2^a$ |
|---------------------------------------------------------|------------------------------------------|-------------------------------------------|--------------------------------------------|--------------------------------|
| $R = R_1 = R_2 = H$                                     | 4.9                                      | 7.3                                       | 12.2                                       | 3.1                            |
| $R = 2\text{-CH}_3$ ; $R_1 = R_2 = H$                   | 8.7                                      | 5.2                                       | 13.9                                       | 3.5                            |
| $R = 3\text{-CH}_3$ ; $R_1 = R_2 = H$                   | 6.3                                      | 5.8                                       | 12.1                                       | 3.1                            |
| $R = 2\text{-CH}_3$ ; $R_1 = H$ ; $R_2 = 3\text{-CH}_3$ | 9.0                                      | 5.0                                       | 14.0                                       | 3.5                            |
| $R = 2\text{-CH}_3$ ; $R_1 = \text{CH}_3$ ; $R_2 = H$   | 6.9                                      | 8.4                                       | 15.3                                       | 3.8                            |
| $R = H$ ; $R_1 = \text{CH}_3$ ; $R_2 = \text{CH}_3$     | 6.9                                      | 8.3                                       | 15.2                                       | 3.9                            |

<sup>a</sup> Difference in reaction enthalpy per mole  $H_2$  calculated from data for Reaction R-III.

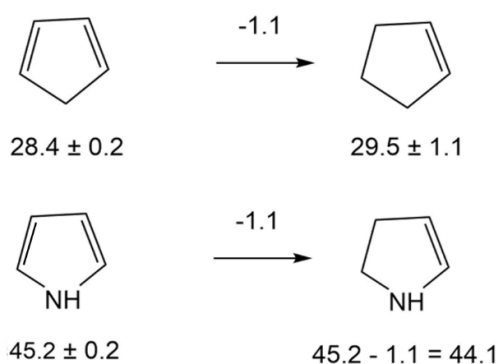

**Figure S1.** Calculation of vaporisation enthalpy of 2-pyrroline:.

Line 1: difference between vaporisation enthalpies of 1,3-cyclopentadiene and cyclopentene;

Line 2: the difference from Line 1 was subtracted from vaporisation enthalpy of 1H-pyrrole.

Figures below molecules are  $\Delta_f H_m^o(298.15\text{ K})$  taken from [1]. Figures above the arrows are differences in vaporisation enthalpies,  $\Delta_l^g H_m^o(298.15\text{ K})$ . All values are in  $\text{kJ}\cdot\text{mol}^{-1}$ .

$\Delta_f H_m^o(\text{g}, 298.15\text{ K}, 2\text{-pyrroline}) = 97.5\text{ kJ}\cdot\text{mol}^{-1}$  (calculated by G4(AT) in this work).

$\Delta_f H_m^o(\text{liq}, 298.15\text{ K}, 2\text{-pyrroline}) = 97.5 - 44.1 = 53.4\text{ kJ}\cdot\text{mol}^{-1}$  (see Table S2).

**Table S9.** Gas-phase standard molar thermodynamic properties of 2-methyl-indole and 2-methyl-H8-indole at  $T = 298.15\text{ K}$ .

| Compound           | $\Delta_f H_m^o$<br>$\text{kJ}\cdot\text{mol}^{-1}$ | $\Delta_f S_m^o$<br>$\text{J}\cdot\text{K}^{-1}\cdot\text{mol}^{-1}$ | $\Delta_f G_m^o$<br>$\text{kJ}\cdot\text{mol}^{-1}$ | $S_m^o$<br>$\text{J}\cdot\text{K}^{-1}\cdot\text{mol}^{-1}$ | $C_{p,m}^o$<br>$\text{J}\cdot\text{K}^{-1}\cdot\text{mol}^{-1}$ |
|--------------------|-----------------------------------------------------|----------------------------------------------------------------------|-----------------------------------------------------|-------------------------------------------------------------|-----------------------------------------------------------------|
| 2-methyl-indole    | 121.6±1.5                                           | -366.0                                                               | 230.7                                               | 368.8                                                       | 146.1                                                           |
| 2-methyl-H8-indole | -99.3±2.2                                           | -850.8                                                               | 154.4                                               | 406.1                                                       | 178.6                                                           |

### Computation of the thermodynamic properties for studied compounds in ideal gas state.

The conformer search was carried out by using Conformer Rotamer Ensemble Sampling Tool (CREST) by Grimmer utilizing metadynamic scan of the chemical compound, conformer and reaction space followed by optimization of the found conformers and rotamers at GFN2-xTB level of theory [20,21].

After the CREST stage, the geometries of all found conformers were further optimized and vibrational frequencies and methyl rotational potentials for molecules with  $\text{CH}_3$ -rotating top were computed using B3LYP hybrid density functional theory with the cc-pvtz(D3BJ) basis set [22,23] with the help of Gaussian 16 package [24].

Thus evaluated results correspond to approximation of «rigid rotor - harmonic oscillator». The most useful way to adjust the computed harmonic vibrational modes to the level of real molecules in gas phase is to scale them depending on the type of mode (stretching, deformational and so on). For complicated molecules distinguishing the type of vibrating mode is a challenging task and, in many cases, not possible. Therefore, we have divided the whole spectra into 4 regions: stretching N-H vibration (near  $3500\text{ cm}^{-1}$ ),

stretching C-H vibrations (2600 to 3100  $\text{cm}^{-1}$ ) and deformation vibrations in the intervals 1000 to 2000  $\text{cm}^{-1}$  and below 1000  $\text{cm}^{-1}$ . The values of scaling factors were evaluated by comparing the available in gas phase IR spectra [25] for indole, indoline and 2-methyl indoline with computational results. For 8H-indole only liquid phase IR spectrum is available for neat sample. No literature IR spectrum was found for 2-methyl-8H-indole. The results of comparison of scaled computed spectra with gas and liquid phase experimental spectrum is given in Figures S1-S4. In 2-methyl indoline and 2-methyl-8H-indole the methyl torsion was treated as a three-fold one-dimensional hindered rotor

**Table S10.** The gas-phase standard molar heat capacity,  $C_{p,m}^0$ , of indole

| $T, \text{K}$ | $C_{p,m}^0$ , [26]<br>$\text{J K}^{-1} \text{mol}^{-1}$ | $C_{p,m}^0$ (calc),<br>$\text{J K}^{-1} \text{mol}^{-1}$ | $\Delta^a$ |
|---------------|---------------------------------------------------------|----------------------------------------------------------|------------|
| 298.15        | 120.9                                                   | 120.9                                                    | 0.0        |
| 300           | 121.7                                                   | 121.9                                                    | 0.2        |
| 320           | 130.4                                                   | 132.9                                                    | 2.5        |
| 340           | 139                                                     | 143.1                                                    | 4.1        |
| 360           | 147.3                                                   | 152.8                                                    | 5.5        |
| 380           | 155.4                                                   | 161.9                                                    | 6.5        |
| 400           | 163.2                                                   | 170.6                                                    | 7.4        |
| 420           | 170.8                                                   | 178.8                                                    | 8.0        |
| 440           | 178                                                     | 186.7                                                    | 8.7        |
| 460           | 184.9                                                   | 194.2                                                    | 9.3        |
| 480           | 191.5                                                   | 201.4                                                    | 9.9        |
| 500           | 197.8                                                   | 208.3                                                    | 10.5       |
| 520           | 203.8                                                   | 214.9                                                    | 11.1       |
| 540           | 209.5                                                   | 221.3                                                    | 11.8       |
| 560           | 215                                                     | 227.4                                                    | 12.4       |
| 580           | 220.2                                                   | 233.4                                                    | 13.2       |
| 600           | 225.2                                                   | 239.1                                                    | 13.9       |

<sup>a</sup> Difference between column 3 and 2 in this table.

**Table S11.** The gas-phase standard molar heat capacity,  $C_{p,m}^0$ , of indoline

| $T, \text{K}$ | $C_{p,m}^0$ , [26]<br>$\text{J K}^{-1} \text{mol}^{-1}$ | $C_{p,m}^0$ (calc),<br>$\text{J K}^{-1} \text{mol}^{-1}$ | $\Delta^a$ |
|---------------|---------------------------------------------------------|----------------------------------------------------------|------------|
| 298.15        | 127.5                                                   | 127.5                                                    | 0.0        |
| 300           | 128.4                                                   | 128.5                                                    | 0.1        |
| 320           | 137.8                                                   | 139.5                                                    | 1.7        |
| 340           | 147.1                                                   | 149.7                                                    | 2.6        |
| 360           | 156.2                                                   | 159.4                                                    | 3.2        |
| 380           | 165.1                                                   | 168.5                                                    | 3.4        |
| 400           | 173.7                                                   | 177.2                                                    | 3.5        |
| 420           | 182.1                                                   | 185.4                                                    | 3.3        |
| 440           | 190.2                                                   | 193.3                                                    | 3.1        |
| 460           | 198.0                                                   | 200.8                                                    | 2.8        |
| 480           | 205.5                                                   | 208.0                                                    | 2.5        |
| 500           | 212.7                                                   | 214.9                                                    | 2.2        |
| 520           | 219.5                                                   | 221.5                                                    | 2.0        |
| 540           | 226.1                                                   | 227.9                                                    | 1.8        |
| 560           | 232.5                                                   | 234.0                                                    | 1.5        |
| 580           | 238.5                                                   | 240.0                                                    | 1.5        |
| 600           | 244.3                                                   | 245.7                                                    | 1.4        |



<sup>a</sup> Difference between column 3 and 2 in this table.

**Table S12.** The gas-phase standard molar heat capacity,  $C_{p,m}^0$ , of 8H-indole

| $T, K$ | $C_{p,m}^0$ , [26]<br>$J K^{-1} mol^{-1}$ | $C_{p,m}^0$ (calc),<br>$J K^{-1} mol^{-1}$ | $\Delta^a$ |
|--------|-------------------------------------------|--------------------------------------------|------------|
| 298.15 | 151.5                                     | 151.5                                      | 0.0        |
| 300    | 152.5                                     | 153.0                                      | 0.5        |
| 320    | 164.4                                     | 168.5                                      | 4.1        |
| 340    | 176.3                                     | 183.0                                      | 6.7        |
| 360    | 188.2                                     | 196.7                                      | 8.5        |
| 380    | 200.0                                     | 209.7                                      | 9.7        |
| 400    | 211.6                                     | 222.0                                      | 10.4       |
| 420    | 222.9                                     | 233.7                                      | 10.8       |
| 440    | 234.0                                     | 244.9                                      | 10.9       |
| 460    | 244.7                                     | 255.6                                      | 10.9       |
| 480    | 255.1                                     | 265.8                                      | 10.7       |
| 500    | 265.2                                     | 275.6                                      | 10.4       |
| 520    | 274.9                                     | 285.0                                      | 10.1       |
| 540    | 284.3                                     | 294.1                                      | 9.8        |
| 560    | 293.3                                     | 302.8                                      | 9.5        |
| 580    | 302.0                                     | 311.2                                      | 9.2        |
| 600    | 310.0                                     | 319.3                                      | 9.3        |

<sup>a</sup> Difference between column 3 and 2 in this table.

**Table S13.** The gas-phase standard molar heat capacity,  $C_{p,m}^0$ , of 2Me-indole

| $T, K$ | $C_{p,m}^0$ , [26]<br>$J K^{-1} mol^{-1}$ | $C_{p,m}^0$ (calc),<br>$J K^{-1} mol^{-1}$ | $\Delta^a$ |
|--------|-------------------------------------------|--------------------------------------------|------------|
| 298.15 | 146.1                                     | 146.1                                      | 0.0        |
| 300    | 147.0                                     | 147.1                                      | 0.1        |
| 320    | 156.5                                     | 158.1                                      | 1.6        |
| 340    | 165.9                                     | 168.3                                      | 2.4        |
| 360    | 175.1                                     | 178.0                                      | 2.9        |
| 380    | 184.1                                     | 187.1                                      | 3.0        |
| 400    | 192.8                                     | 195.8                                      | 3.0        |
| 420    | 201.3                                     | 204.0                                      | 2.7        |
| 440    | 209.4                                     | 211.9                                      | 2.5        |
| 460    | 217.2                                     | 219.4                                      | 2.2        |
| 480    | 224.7                                     | 226.6                                      | 1.9        |
| 500    | 231.9                                     | 233.5                                      | 1.6        |
| 520    | 238.8                                     | 240.1                                      | 1.3        |
| 540    | 245.4                                     | 246.5                                      | 1.1        |
| 560    | 251.8                                     | 252.6                                      | 0.8        |
| 580    | 257.8                                     | 258.6                                      | 0.8        |
| 600    | 263.7                                     | 264.3                                      | 0.6        |

<sup>a</sup> Difference between column 3 and 2 in this table.

**Table S14.** The gas-phase standard molar heat capacity,  $C_{p,m}^0$ , of 2-Me-indoline

| $T, K$ | $C_{p,m}^0$ , [26]<br>$J K^{-1} mol^{-1}$ | $C_{p,m}^0$ (calc),<br>$J K^{-1} mol^{-1}$ | $\Delta^a$ |
|--------|-------------------------------------------|--------------------------------------------|------------|
| 298.15 | 174                                       | 174.0                                      | 0.0        |
| 300    | 175                                       | 175.0                                      | 0.0        |
| 320    | 186.2                                     | 186.0                                      | -0.2       |
| 340    | 197.1                                     | 196.2                                      | -0.9       |
| 360    | 207.6                                     | 205.9                                      | -1.7       |
| 380    | 217.8                                     | 215.0                                      | -2.8       |
| 400    | 227.6                                     | 223.7                                      | -3.9       |
| 420    | 236.9                                     | 231.9                                      | -5.0       |
| 440    | 245.8                                     | 239.8                                      | -6.0       |
| 460    | 254.3                                     | 247.3                                      | -7.0       |
| 480    | 262.5                                     | 254.5                                      | -8.0       |
| 500    | 270.2                                     | 261.4                                      | -8.8       |
| 520    | 277.6                                     | 268.0                                      | -9.6       |
| 540    | 284.6                                     | 274.4                                      | -10.2      |
| 560    | 291.3                                     | 280.5                                      | -10.8      |
| 580    | 297.8                                     | 286.5                                      | -11.3      |
| 600    | 303.9                                     | 292.2                                      | -11.7      |

<sup>a</sup> Difference between column 3 and 2 in this table.**Table S15.** The gas-phase standard molar heat capacity,  $C_{p,m}^0$ , of 2Me-8H-indole

| $T, K$ | $C_{p,m}^0$ , [26]<br>$J K^{-1} mol^{-1}$ | $C_{p,m}^0$ (calc),<br>$J K^{-1} mol^{-1}$ | $\Delta^a$ |
|--------|-------------------------------------------|--------------------------------------------|------------|
| 298.15 | 178.6                                     | 178.6                                      | 0.0        |
| 300    | 179.8                                     | 180.1                                      | 0.3        |
| 320    | 193.0                                     | 195.6                                      | 2.6        |
| 340    | 206.1                                     | 210.1                                      | 4.0        |
| 360    | 219.2                                     | 223.8                                      | 4.6        |
| 380    | 232.1                                     | 236.8                                      | 4.7        |
| 400    | 244.8                                     | 249.1                                      | 4.3        |
| 420    | 257.3                                     | 260.8                                      | 3.5        |
| 440    | 269.3                                     | 272.0                                      | 2.7        |
| 460    | 281.0                                     | 282.7                                      | 1.7        |
| 480    | 292.4                                     | 292.9                                      | 0.5        |
| 500    | 303.3                                     | 302.7                                      | -0.6       |
| 520    | 313.9                                     | 312.1                                      | -1.8       |
| 540    | 324.1                                     | 321.2                                      | -2.9       |
| 560    | 333.9                                     | 329.9                                      | -4.0       |
| 580    | 343.3                                     | 338.3                                      | -5.0       |
| 600    | 352.4                                     | 346.4                                      | -6.0       |

<sup>a</sup> Difference between column 3 and 2 in this table.

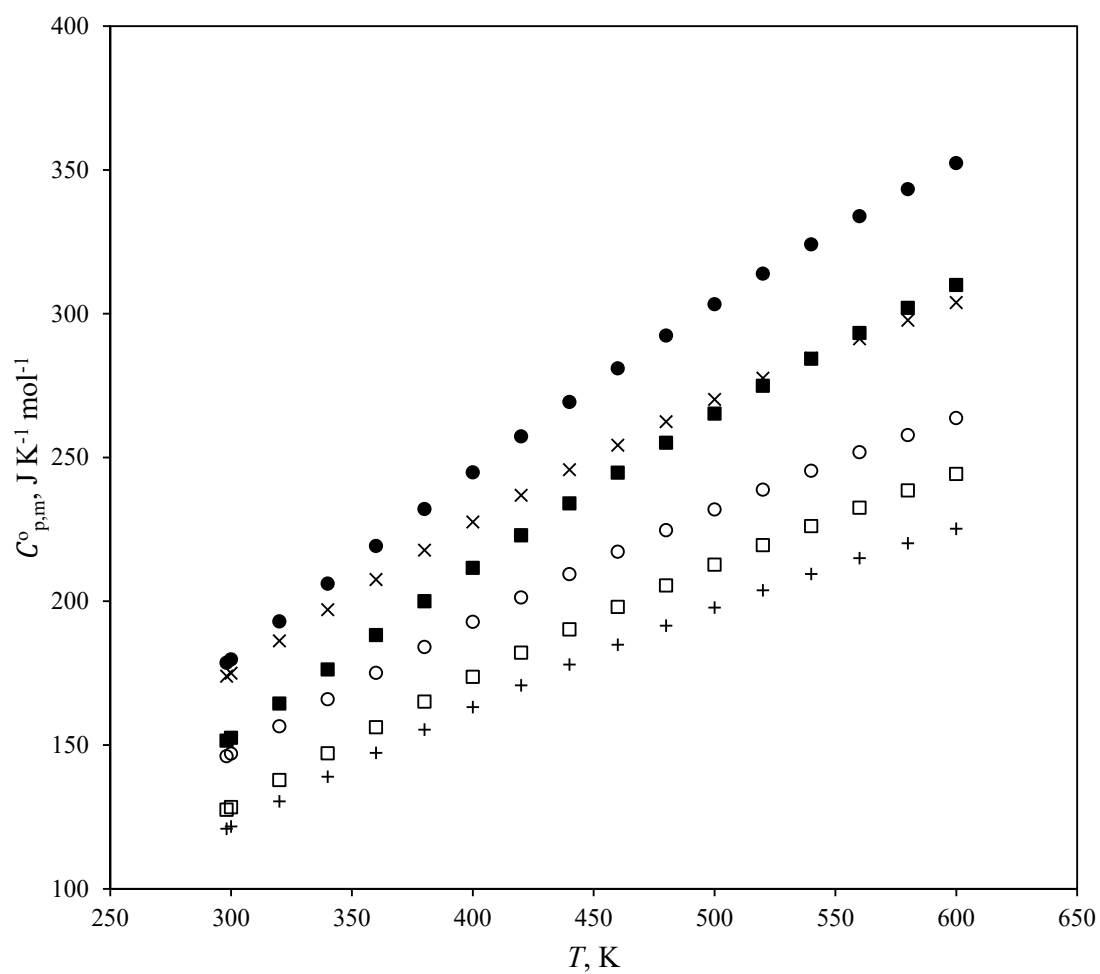

**Figure S2.** Temperature dependence of the gas-phase standard molar heat capacities:.

● - 2Me-8H-indole, ■ - 8H-indole, □ - Indoline, ○ - 2Me-indole, × - 2-Me-indoline, + indole.

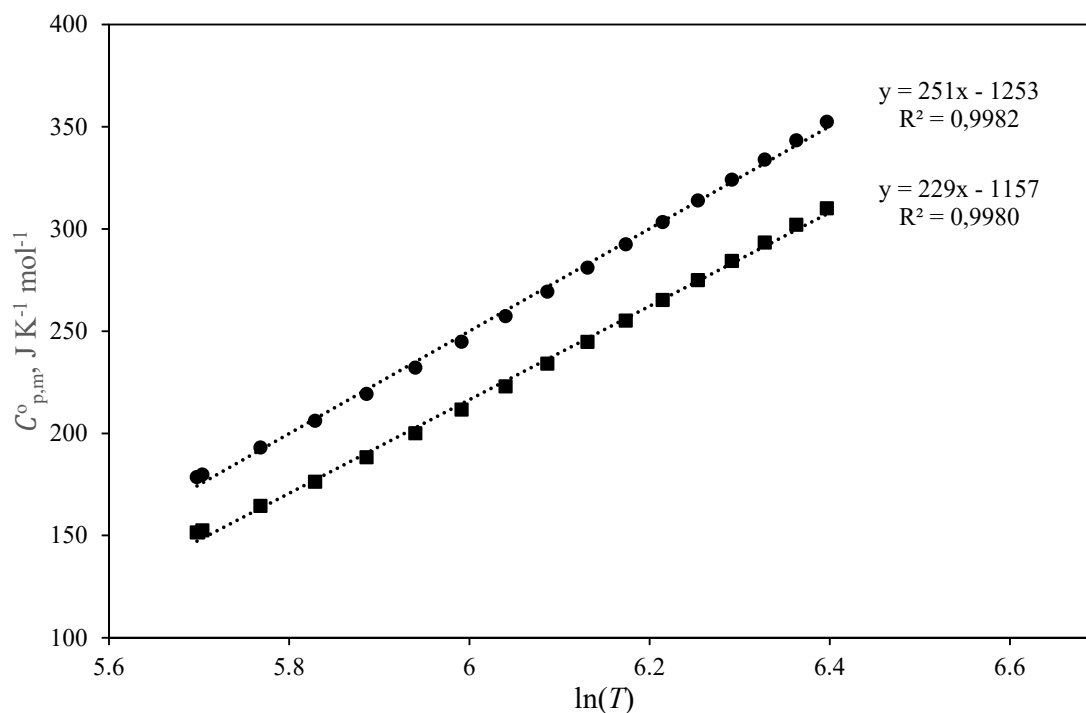

**Figure S3.** Dependence of the gas-phase standard molar heat capacity on  $\ln(T)$ :  
 ● - 2Me-8Hindole, ■ - 8H-indole

## References

- Pedley, J.B.; Naylor, R.D.; Kirby, S.P. *Thermochemical Data of Organic Compounds*; Chapman and Hall: New York, NY, USA, 1986; pp. 1–792.
- Dorofeeva, O.V.; Filimonova, M.A.; Marochkin, I.I. Aliphatic Amines: A Critical Analysis of the Experimental Enthalpies of Formation by Comparison with Theoretical Calculations. *J. Chem. Eng. Data* **2019**, *64*, 5630–5647, doi:10.1021/acs.jced.9b00680.
- Verevkin, S.P. Thermochemical Investigation on  $\alpha$ -Methyl-Styrene and Parent Phenyl Substituted Alkenes. *Thermochim. Acta* **1999**, *326*, 17–25, doi:10.1016/S0040-6031(98)00585-1.
- Safronov, S.P.; Vostrikov, S.V.; Samarov, A.A.; Wasserscheid, P.; Müller, K.; Verevkin, S.P. Comprehensive Thermodynamic Study of Substituted Indoles/Perhydro Indoles as Potential Liquid Organic Hydrogen Carrier System. *Fuel* **2023**, *331*, 125764, doi:10.1016/j.fuel.2022.125764.
- Dean, B.D.; Truce, W.E. Oxidative Conversions of Sulfene-Cycloadducts from Azaheptafulvenes and from Tropone to 1,2-Disubstituted Indoles and 2-Aryl-Benzofurans, Respectively. *J. Org. Chem.* **1981**, *46*, 3575–3576, doi:10.1021/jo00330a050.
- Sigma-Aldrich. Available Online: <https://www.sigmaaldrich.com/> (accessed on 7 February 2023).
- Abdelaziz, A.; Zaitsau, D.H.; Kuratieva, N.V.; Verevkin, S.P.; Schick, C. Melting of Nucleobases. Getting the Cutting Edge of “Walden’s Rule”. *Phys. Chem. Chem. Phys.* **2019**, *21*, 12787–12797, doi:10.1039/C9CP00716D.
- Walden, P. Über Die Schmelzwärme, Spezifische Kohäsion und Molekulargröße Bei Der Schmelztemperatur. *Z. Elektrotechnik Elektrochem.* **1908**, *14*, 713–724, doi:10.1002/bbpc.19080144302.
- Nagrimanov, R.N.; Ziganshin, M.A.; Solomonov, B.N.; Verevkin, S.P. Thermochemistry of Drugs: Experimental and Theoretical Study of Analgesics. *Struct. Chem.* **2019**, *30*, 247–261, doi:10.1007/s11224-018-1188-z.
- Verevkin, S.P.; Emel’yanenko, V.N.; Nagrimanov, R.N. Nearest-Neighbor and Non-Nearest-Neighbor Interactions between Substituents in the Benzene Ring. Experimental and Theoretical Study of Functionally Substituted Benzamides. *J. Phys. Chem. A* **2016**, *120*, 9867–9877, doi:10.1021/acs.jpca.6b10332.
- Chickos, J.S.; Hosseini, S.; Hesse, D.G.; Liebman, J.F. Heat Capacity Corrections to a Standard State: A Comparison of New and Some Literature Methods for Organic Liquids and Solids. *Struct. Chem.* **1993**, *4*, 271–278, doi:10.1007/BF00673701.
- Acree, W.; Chickos, J.S. Phase Transition Enthalpy Measurements of Organic and Organometallic Compounds and Ionic Liquids. Sublimation, Vaporization, and Fusion Enthalpies from 1880 to 2015. Part 2. C11–C192. *J. Phys. Chem. Ref. Data* **2017**, *46*, 013104, doi:10.1063/1.4970519.
- Kulikov, D.; Verevkin, S.P.; Heintz, A. Determination of Vapor Pressures and Vaporization Enthalpies of the Aliphatic Branched C 5 and C 6 Alcohols. *J. Chem. Eng. Data* **2001**, *46*, 1593–1600, doi:10.1021/je010187p.

14. Verevkin, S.P.; Emel'yanenko, V.N. Transpiration Method: Vapor Pressures and Enthalpies of Vaporization of Some Low-Boiling Esters. *Fluid Phase Equilib.* **2008**, *266*, 64–75, doi:10.1016/j.fluid.2008.02.001.
15. Verevkin, S.P.; Sazonova, A.Y.; Emel'yanenko, V.N.; Zaitsau, D.H.; Varfolomeev, M.A.; Solomonov, B.N.; Zherikova, K. V. Thermochemistry of Halogen-Substituted Methylbenzenes. *J. Chem. Eng. Data* **2015**, *60*, 89–103, doi:10.1021/je500784s.
16. Emel'yanenko, V.N.; Verevkin, S.P. Benchmark Thermodynamic Properties of 1,3-Propanediol: Comprehensive Experimental and Theoretical Study. *J. Chem. Thermodyn.* **2015**, *85*, 111–119, doi:10.1016/j.jct.2015.01.014.
17. Chickos, J.S.; Acree, W.E. Enthalpies of Vaporization of Organic and Organometallic Compounds, 1880–2002. *J. Phys. Chem. Ref. Data* **2003**, *32*, 519–878, doi:10.1063/1.1529214.
18. SciFinder—Chemical Abstracts Service. Available Online: <http://scifinder.cas.org/> (accessed on 7 February 2023).
19. Vassilaros, D.L.; Kong, R.C.; Later, D.W.; Lee, M.L. Linear Retention Index System for Polycyclic Aromatic Compounds. *J. Chromatogr. A* **1982**, *252*, 1–20, doi:10.1016/S0021-9673(01)88394-1.
20. Pracht, P.; Bohle, F.; Grimme, S. Automated Exploration of the Low-Energy Chemical Space with Fast Quantum Chemical Methods. *Phys. Chem. Chem. Phys.* **2020**, *22*, 7169–7192, doi:10.1039/C9CP06869D.
21. Grimme, S. Exploration of Chemical Compound, Conformer, and Reaction Space with Meta-Dynamics Simulations Based on Tight-Binding Quantum Chemical Calculations. *J. Chem. Theory Comput.* **2019**, *15*, 2847–2862, doi:10.1021/acs.jctc.9b00143.
22. Rappoport, D.; Furche, F. Property-Optimized Gaussian Basis Sets for Molecular Response Calculations. *J. Chem. Phys.* **2010**, *133*, 134105, doi:10.1063/1.3484283.
23. Grimme, S.; Ehrlich, S.; Goerigk, L. Effect of the Damping Function in Dispersion Corrected Density Functional Theory. *J. Comput. Chem.* **2011**, *32*, 1456–1465, doi:10.1002/jcc.21759.
24. Frisch, M.J.; Trucks, G.W.; Schlegel, H.B.; Scuseria, G.E.; Robb, M.A.; Cheeseman, J.R.; Scalmani, G.; Barone, V.; Petersson, G.A.; Nakatsuji, H.; et al. Gaussian 16, Revision C.01 Gaussian, Inc., Wallingford CT. 2016.
25. NIST Chemistry WebBook. Available Online: <https://webbook.nist.gov/chemistry/> (accessed on 7 February 2023).
26. Konnova, M.E.; Li, S.; Bösmann, A.; Müller, K.; Wasserscheid, P.; Andreeva, I. V.; Turovtzev, V. V.; Zaitsau, D.H.; Pimerzin, A.A.; Verevkin, S.P. Thermochemical Properties and Dehydrogenation Thermodynamics of Indole Derivates. *Ind. Eng. Chem. Res.* **2020**, *59*, 20539–20550, doi:10.1021/acs.iecr.0c04069.
